# Supplementary material
Source: PubMed Central journal article supplement (PMC11028278)
Supplement: 262_2019_2370_MOESM1_ESM.pdf [file 262_2019_2370_MOESM1_ESM.pdf]

Supplementary Figure 1

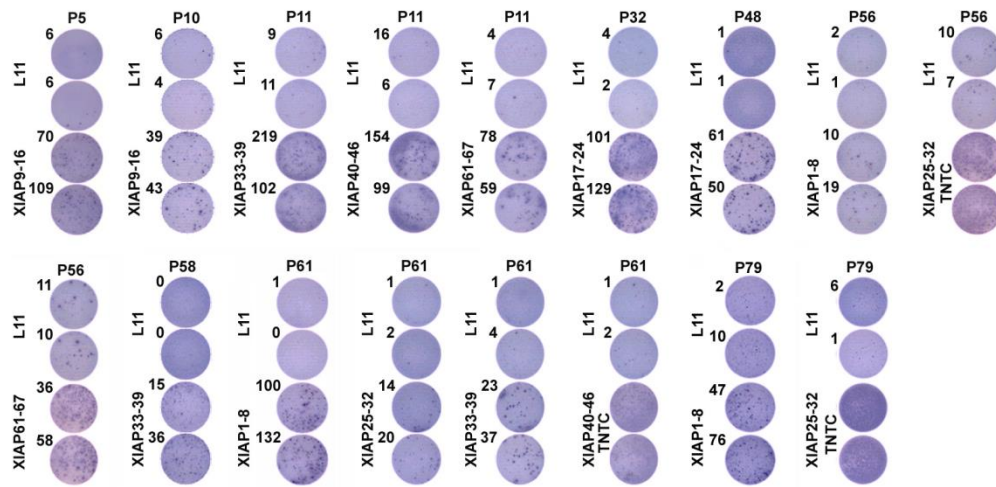

**Supplementary Figure 1.** T cell responses to peptide pools of XIAP in stage-IV melanoma patients using ELISPOT assays. TNTC: too numerous to count.

Supplementary Figure 2

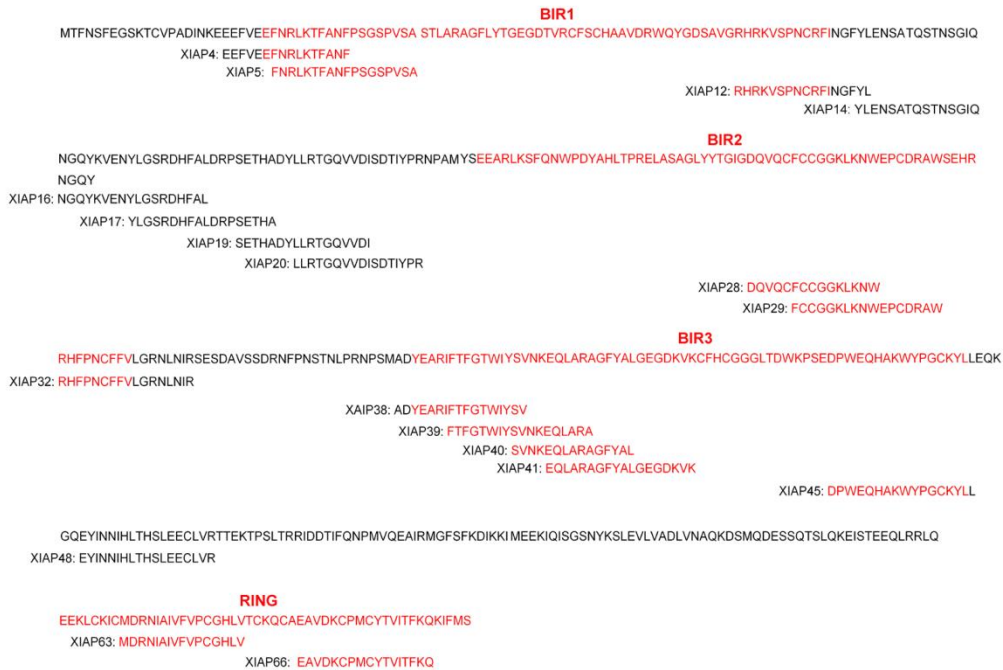

T cell responses to individual peptides of XIAP  
in patients without treatment

XIAP4: P61  
 XIAP5: P56, P61, P79  
 XIAP12: P10  
 XIAP14: P5  
 XIAP16: P10  
 XIAP17: P32  
 XIAP19: P48  
 XIAP28: P61, P79  
 XIAP29: P56  
 XIAP38: P11, P61  
 XIAP39: P58  
 XIAP40: P11  
 XIAP41: P61  
 XIAP45: P61  
 XIAP63: P56  
 XIAP66: P11, P56

T cell responses to individual peptides of XIAP  
in patients receiving ipilimumab

XIAP5: P130  
 XIAP19: P27  
 XIAP20: P102  
 XIAP28: P130  
 XIAP32: P110  
 XIAP39: P124  
 XIAP48: P140

**Supplementary Figure 2.** Positions of XIAP peptides that induced T cell responses in the BIR domain and RING finger motifs of XIAP. BIR domains and RING finger motifs are indicated in red.

Supplementary Figure 3

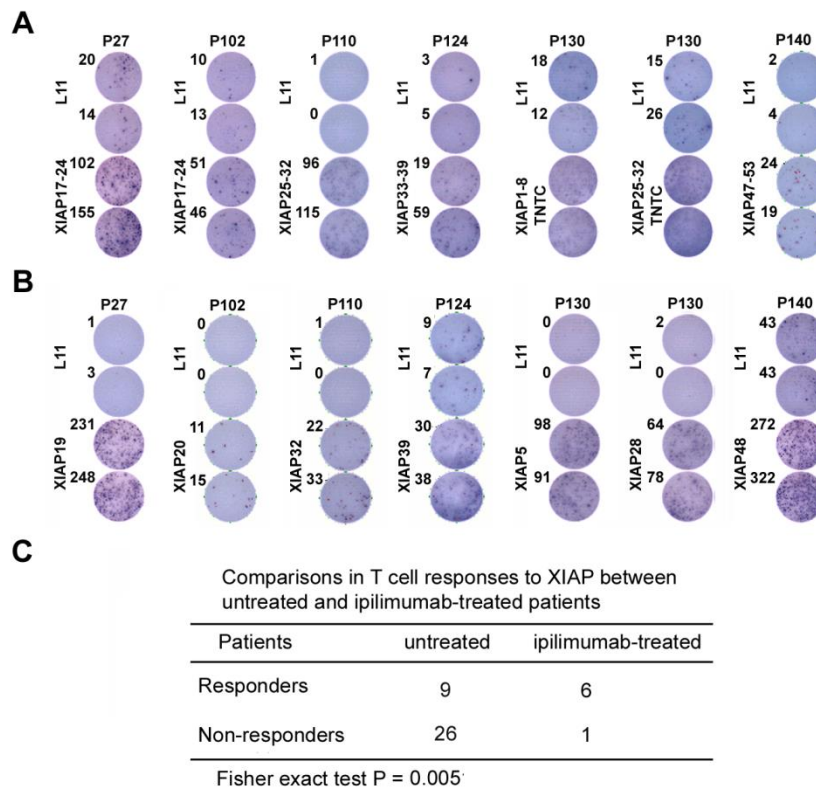

**Supplementary Figure 3.** T cell responses of melanoma patients to XIAP peptides following ipilimumab treatment. (A) T cell responses to peptide pools of XIAP in stage-IV melanoma patients following ipilimumab treatment using ELISPOT analyses. (B) T cell responses to individual peptides from the reactive peptide pools by ELISPOT analyses. (C) Comparisons of T cell responses to XIAP peptide pools between patients with and without ipilimumab treatment. Statistical comparisons were conducted using Fisher's exact tests.  $P < 0.05$  was considered statistically significant.

Supplementary Figure 4

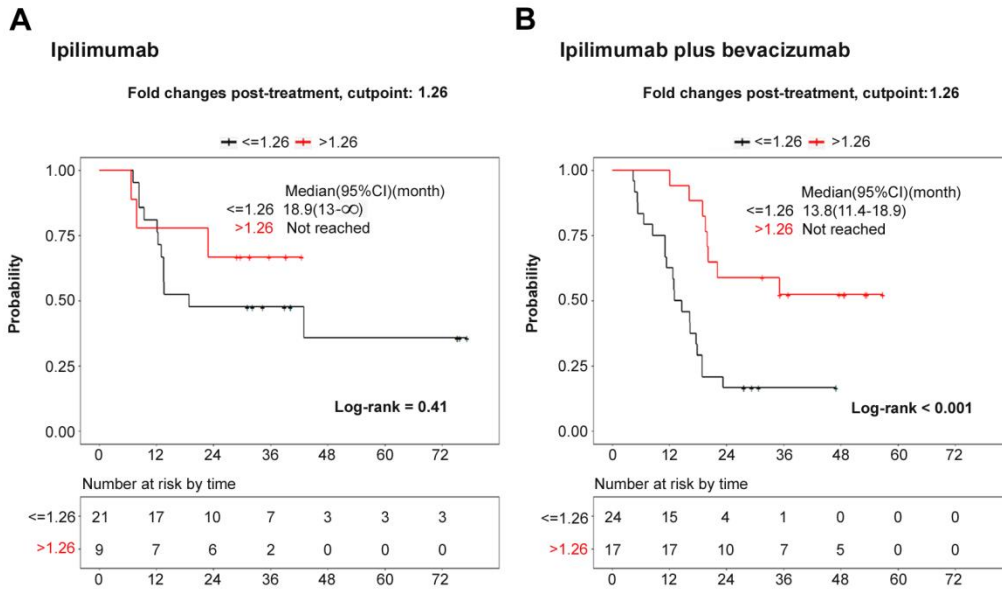

**Supplementary Figure 4.** Associations between survival and serologic responses to recombinant XIAP in melanoma patients receiving either (A) ipilimumab or (B) ipilimumab plus bevacizumab. Pre-treatment and post-treatment sera samples were examined by ELISA. Survival of high versus low fold-change (FC) groups were compared using stratified log-rank tests.  $P < 0.05$  was considered statistically significant.

Supplementary Figure 5

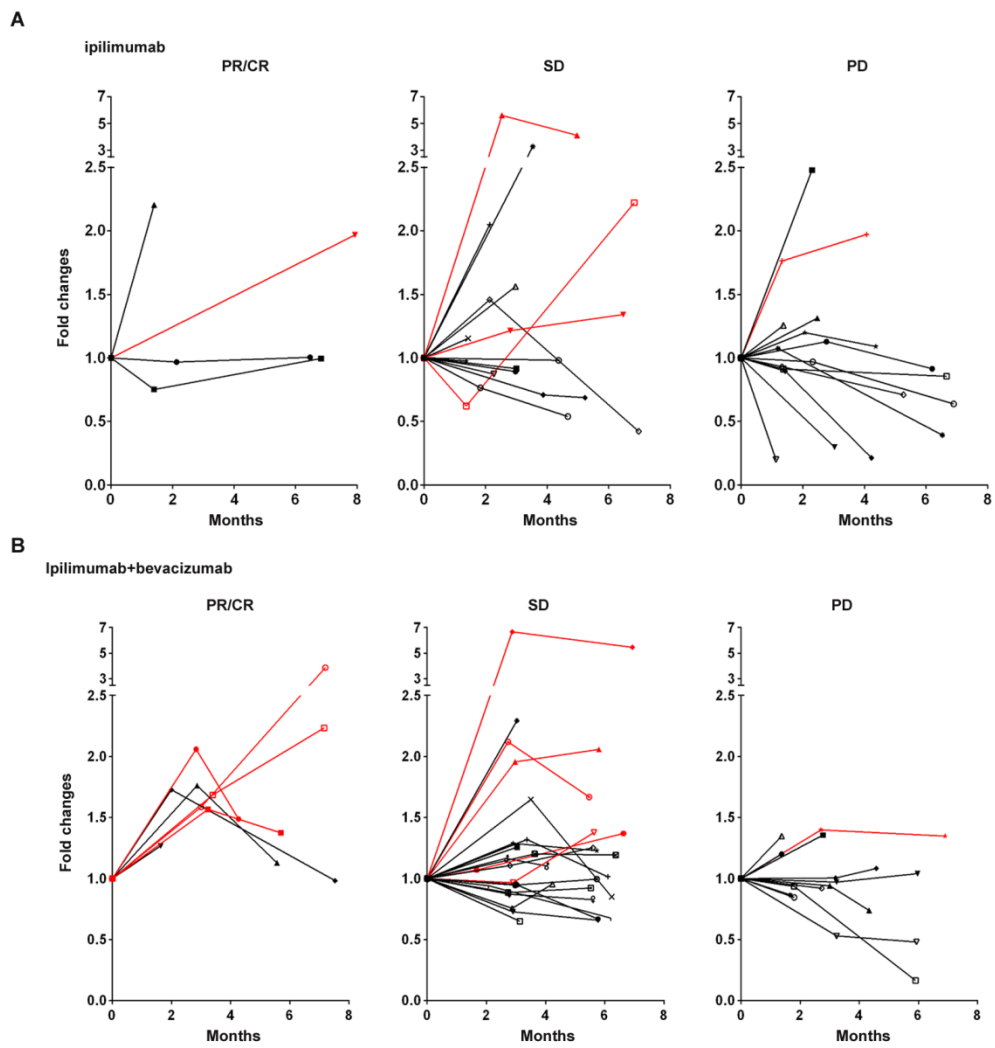

**Supplementary Figure 5.** Sera responses of melanoma patients to recombinant XIAP protein in patients receiving either ipilimumab or ipilimumab plus bevacizumab. Sera responses to recombinant XIAP proteins by ELISA. Long term/delayed increases in sera titers (after 4 months, > 1.26-fold change) are indicated in red.

Supplementary Figure 6

A

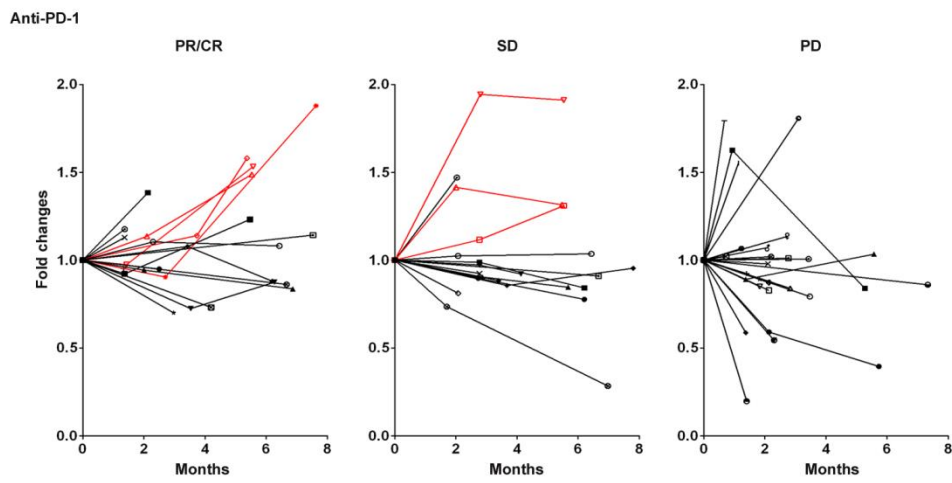

B

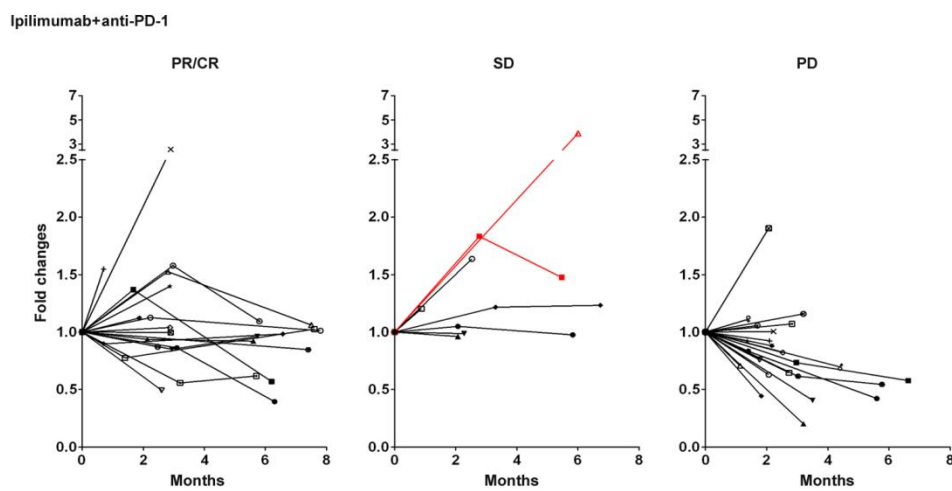

**Supplementary Figure 6.** Sera responses of melanoma patients to recombinant XIAP protein in patients receiving either anti-PD-1 or ipilimumab plus anti-PD-1. Sera responses to recombinant XIAP proteins by ELISA. Long term/delayed increases in sera titers (after 4 months, > 1.26-fold change) are indicated in red.

Supplementary Figure 7

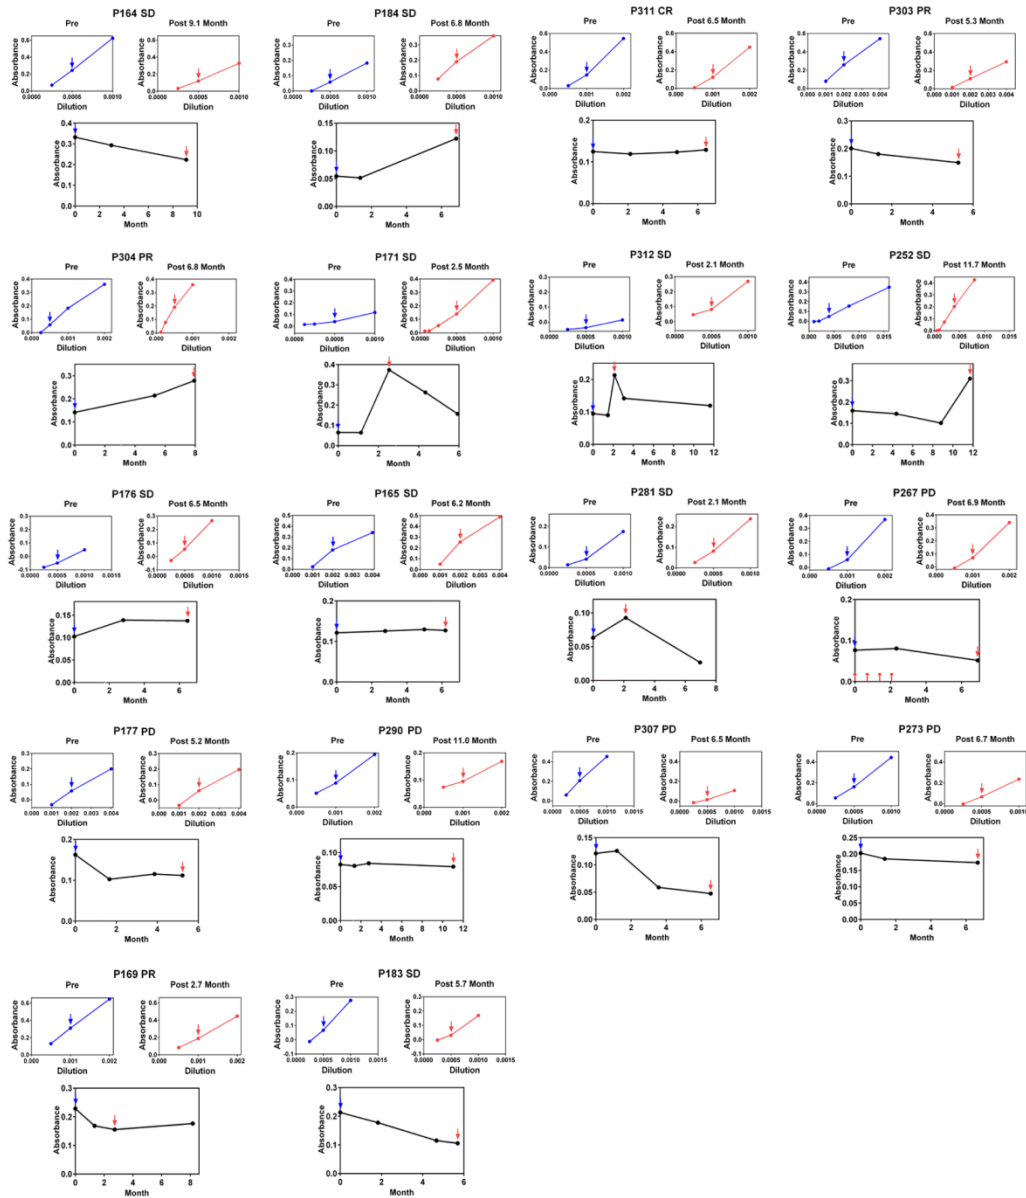

**Supplementary Figure 7.** Titration analyses of sera responses to XIAP by ELISA in patients receiving ipilimumab. Pre- or post-treatment time points of either lowest or highest sera responses to XIAP were chosen. Sera were prepared in a series of dilutions. Sera responses to XIAP at each time point were shown in a dose-dependent manner, and all sera concentrations titrated for ELISA were in dose responses range.

Supplementary Figure 8

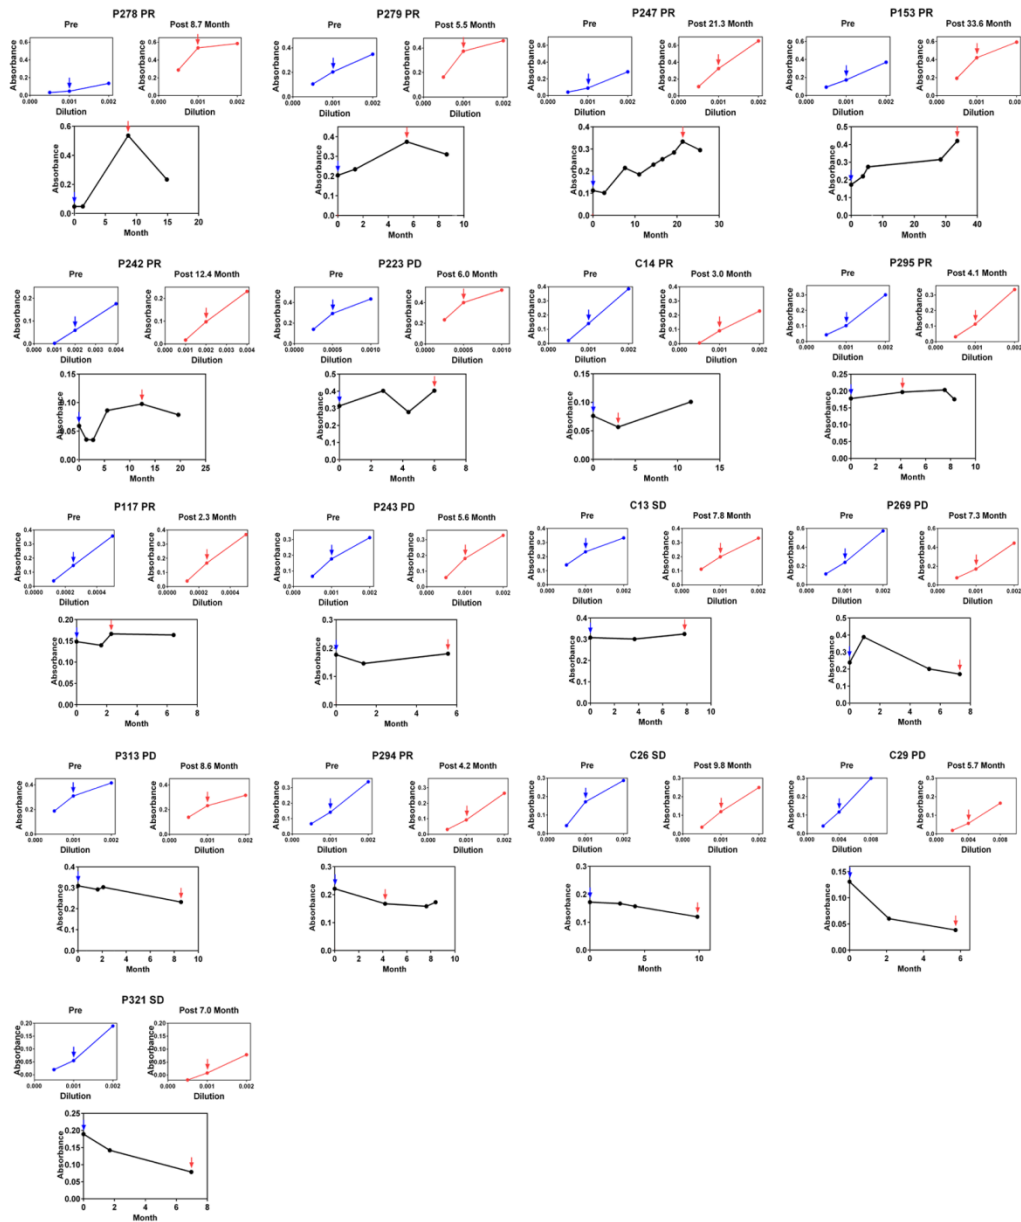

**Supplementary Figure 8.** Titration analyses of sera responses to XIAP by ELISA in patients receiving anti-PD-1. Pre- or post-treatment time points of either lowest or highest sera responses to XIAP were chosen. Sera were prepared in a series of dilution. Sera responses to XIAP at each time point were shown in a dose dependent manner, and all sera concentrations titrated for ELISA were in dose responses range.



Supplementary Figure 9

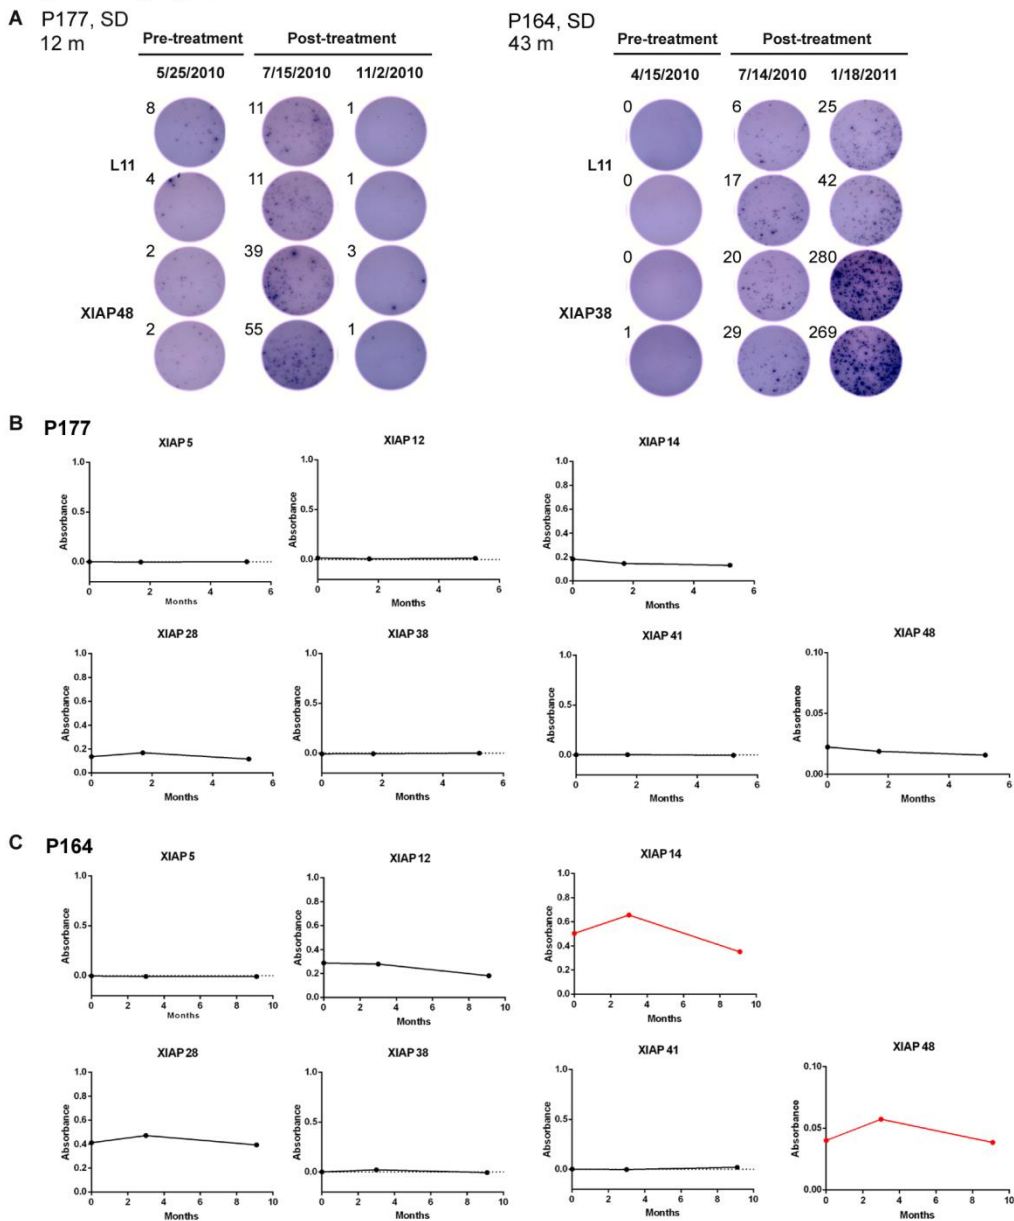

**Supplementary Figure 9.** T cell and sera responses of melanoma patients P177 and P164 to XIAP peptides. (A) T cell responses to XIAP48 in patient P177 receiving ipilimumab, and T cell responses to XIAP38 in patient P164 receiving ipilimumab. TNTC: too numerous to count. M: month. (B) Sera titers to XIAP peptides at pre-treatment and post-treatment in patient P177. (C) Sera titer to XIAP peptides at pre-treatment and post-treatment of patient P164. Red line indicates greater than 1.26-fold increases after treatment.

Supplementary Figure 10

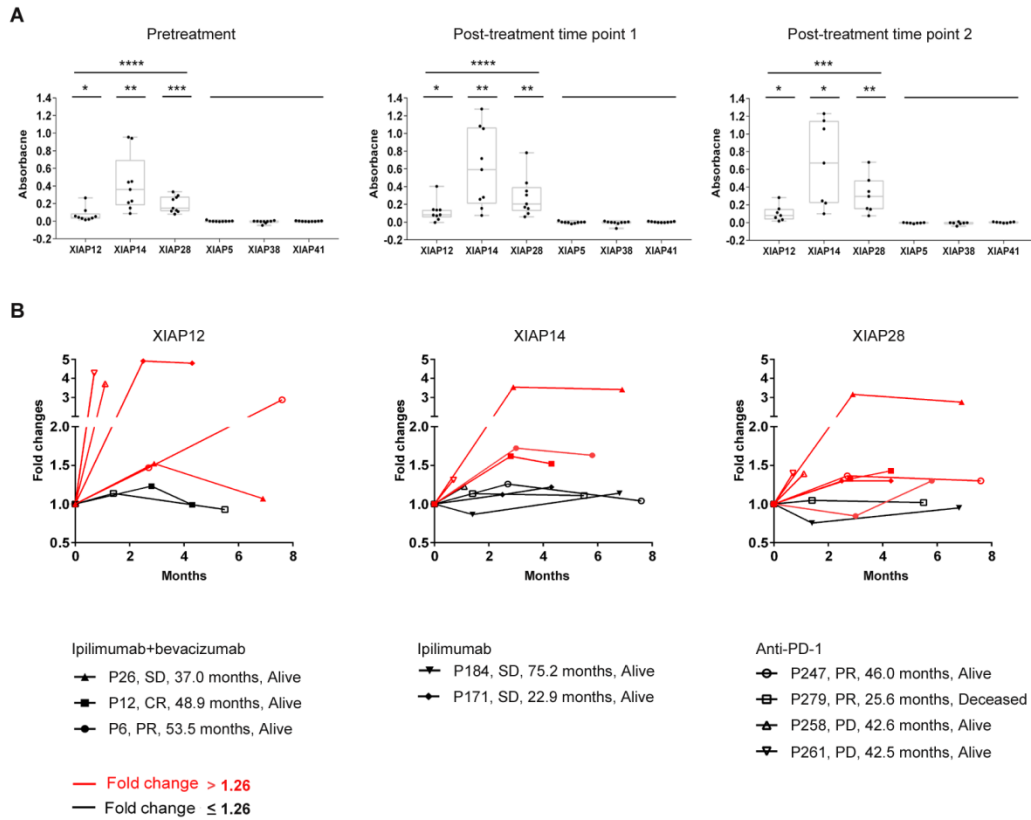

**Supplementary Figure 10.** Sera responses of melanoma patients to XIAP peptides.

(A) Sera titers to XIAP peptides at pre-treatment and post-treatment with check-point blockade. (B) Kinetic changes of sera titer to XIAP peptides after check point blockade. Red lines indicate a greater than 1.26-fold increase after treatment.

## Supplementary Table 1

### Associations between fold-changes of sera titers and clinical response

#### A Ipilimumab-based treatment

|       | $\leq 1.26$ | $> 1.26$ | Total |
|-------|-------------|----------|-------|
| PD+SD | 43          | 18       | 61    |
| CR+PR | 2           | 8        | 10    |

Fisher's exact test  $P=0.004$

#### B Anti-PD-1 antibody

|       | $\leq 1.26$ | $> 1.26$ | Total |
|-------|-------------|----------|-------|
| PD+SD | 34          | 8        | 42    |
| CR+PR | 14          | 1        | 15    |

Fisher's exact test  $P=0.42$

#### C Ipilimumab plus anti-PD-1 antibody

|       | $\leq 1.26$ | $> 1.26$ | Total |
|-------|-------------|----------|-------|
| PD+SD | 25          | 3        | 28    |
| CR+PR | 12          | 6        | 18    |

Fisher's exact test  $P=0.12$

**Supplementary Table 1.** Associations between fold-changes of sera titers to XIAP peptides and clinical response in melanoma patients receiving: (A) ipilimumab-based treatment; (B) anti-PD-1; or, (C) ipilimumab plus anti-PD-1. Statistical comparisons used Fisher's exact tests.  $P < 0.05$  was considered statistically significant.

Supplementary Table 2

Association between response to XIAP and sex or melanoma subtype

A. Ipilimumab-based treatment

|                                        | Unadjusted model    |         | Adjusted model      |         |
|----------------------------------------|---------------------|---------|---------------------|---------|
|                                        | Odds Ratio (95% CI) | P-value | Odds Ratio (95% CI) | P-value |
| XIAP fold-change (> 1.26 vs. <=1.26)   | 9.56 (1.85 – 49.46) | 0.01    | 9.47 (1.82 – 49.36) | 0.01    |
| Sex (Male vs. Female)                  |                     |         | 0.65 (0.15 – 2.77)  | 0.56    |
| Melanoma subtype (Cutaneous vs. Other) |                     |         | 0.69 (0.16 - 3.08)  | 0.63    |

B. Anti-PD-1 antibody

|                                        | Unadjusted model    |         | Adjusted model      |         |
|----------------------------------------|---------------------|---------|---------------------|---------|
|                                        | Odds Ratio (95% CI) | P-value | Odds Ratio (95% CI) | P-value |
| XIAP fold-change (> 1.26 vs. <=1.26)   | 0.30 (0.03-2.66)    | 0.28    | 0.27 (0.03 – 2.54)  | 0.25    |
| Sex (Male vs. Female)                  |                     |         | 2.90 (0.76 – 11.14) | 0.12    |
| Melanoma subtype (Cutaneous vs. Other) |                     |         | 6.01 (0.68 – 52.86) | 0.11    |

C. Ipilimumab plus anti-PD-1 antibody

|                                        | Unadjusted model    |         | Adjusted model            |         |
|----------------------------------------|---------------------|---------|---------------------------|---------|
|                                        | Odds Ratio (95% CI) | P-value | Odds Ratio (95% CI)       | P-value |
| XIAP fold-change (> 1.26 vs. <=1.26)   | 4.17 (0.89 - 19.58) | 0.07    | 7.87 (0.79 – 78.46)       | 0.08    |
| Sex (Male vs. Female)                  |                     |         | 2.22 (0.50 - 9.88)        | 0.29    |
| Melanoma subtype (Cutaneous vs. Other) |                     |         | 470096363.43 (0.00 - Inf) | 0.99    |

**Supplementary Table 2.** Associations of sex and melanoma subtype with response to XIAP based on logistic regression models. (A) ipilimumab-based treatment. (B) anti-PD-1. (C) ipilimumab plus anti-PD-1.  $P < 0.05$  was considered statistically significant.

Supplementary Table 3

Association between overall survival and sex or melanoma subtype

## A. Ipilimumab-based treatment

| Covariates                             | Unadjusted model      |         | Adjusted model        |         |
|----------------------------------------|-----------------------|---------|-----------------------|---------|
|                                        | Hazard Ratio (95% CI) | P-value | Hazard Ratio (95% CI) | P-value |
| XIAP fold-change (> 1.26 vs. ≤1.26)    | 0.38 (0.19 - 0.76)    | <0.01   | 0.36 (0.18 - 0.72)    | <0.01   |
| Sex (Male vs. Female)                  |                       |         | 1.21 (0.65 - 2.24)    | 0.55    |
| Melanoma subtype (Cutaneous vs. Other) |                       |         | 0.64 (0.34 - 1.20)    | 0.16    |

## B. Anti-PD-1 antibody

| Covariates                             | Unadjusted model      |         | Adjusted model        |         |
|----------------------------------------|-----------------------|---------|-----------------------|---------|
|                                        | Hazard Ratio (95% CI) | P-value | Hazard Ratio (95% CI) | P-value |
| XIAP fold-change (> 1.26 vs. ≤1.26)    | 1.37 (0.51 - 3.68)    | 0.53    | 1.47 (0.55 - 3.98)    | 0.44    |
| Sex (Male vs. Female)                  |                       |         | 0.52 (0.26 - 1.04)    | 0.07    |
| Melanoma subtype (Cutaneous vs. Other) |                       |         | 0.54 (0.25 - 1.18)    | 0.12    |

## C. Ipilimumab plus anti-PD-1 antibody

| Covariates                             | Unadjusted model      |         | Adjusted model        |         |
|----------------------------------------|-----------------------|---------|-----------------------|---------|
|                                        | Hazard Ratio (95% CI) | P-value | Hazard Ratio (95% CI) | P-value |
| XIAP fold-change (> 1.26 vs. ≤1.26)    | 0.36 (0.08 - 1.58)    | 0.18    | 0.40 (0.09 - 1.78)    | 0.23    |
| Sex (Male vs. Female)                  |                       |         | 0.56 (0.19 - 1.67)    | 0.30    |
| Melanoma subtype (Cutaneous vs. Other) |                       |         | 0.35 (0.13 - 0.94)    | 0.04    |

**Supplementary Table 3.** Association between overall survival and sex or melanoma subtype based on Cox proportional hazards regression. (A) Ipilimumab-based treatment. (B) Anti-PD-1. (C) Ipilimumab plus anti-PD-1.  $P < 0.05$  was considered statistically significant.
